# Supplementary material
Source: Springer Nature journal article supplement (https://www.springermedizin.de/resource/supplementary/12887_2008_258_MOESM1_ESM.pdf/9477620)
Supplement: MOESM1 [file 9477620]

CA-MRSA

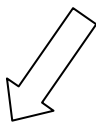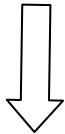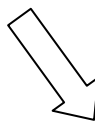

**Factors Influencing SSTI Diagnosis**

Psychosocial Factors

Bacterial  
Epidemiology

Clinical Presentation

Trends and Barriers

Information and  
Resources

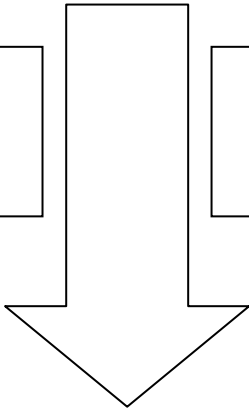

**Clinical Management of SSTIs**

Medical Management

Surgical Management

Diagnostic Testing

Prevention &  
Follow-up
